# Supplementary material
Source: PubMed Central journal article supplement (PMC3834300)
Supplement: nl403266t_si_001.pdf [file nl403266t_si_001.pdf]

1  
2  
3  
4  
5  
6  
7  
8  
9  
10  
11  
12  
13  
14  
15

## Supporting information:

# T cell activation is determined by the number of presented antigens

*Janosch Deeg<sup>1,2</sup>, Markus Axmann<sup>1,2</sup>, Jovana Matic<sup>1,2</sup>, Anastasia Liapis<sup>3</sup>, David Depoil<sup>3</sup>,  
Jehan Afrose<sup>3</sup>, Silvia Curado<sup>3</sup>, Michael L. Dustin<sup>3,4</sup> and Joachim P. Spatz<sup>1,2\*</sup>*

<sup>1</sup>Department of New Materials and Biosystems, Max Planck Institute for Intelligent  
Systems, Heisenbergstraße 3, D-70569 Stuttgart, Germany

<sup>2</sup>Department of Biophysical Chemistry, University of Heidelberg, INF 253, D-69120  
Heidelberg, Germany

<sup>3</sup>Skirball Institute of Biomolecular Medicine and Department of Pathology, New York  
University School of Medicine, New York, NY 10016

<sup>4</sup>Kennedy Institute of Rheumatology, Nuffield Department of Orthopedics,  
Rheumatology and Musculoskeletal Sciences, University of Oxford, Oxford, OX37FY,  
United Kingdom

\*Corresponding author: [spatz@is.mpg.de](mailto:spatz@is.mpg.de)

16

17

18 **Experimental Details:**

19 *Block-Copolymer Micelle Nanolithography:* In order to yield 30-300 nm spaced nano-  
20 patterns AuCl<sub>4</sub>-containing micelle solutions of various polystyrene-block-poly(2-  
21 vinylpyridine) (PS-b-P2 VP) diblock copolymers (Polymer Source Inc., Dorval, Canada)  
22 were prepared as previously described (R. Glass 2003, Spatz 2000). Piranha-cleaned  
23 glass slides were retracted from the micelle solution described above by a custom-made  
24 device at a defined speed. Upon drying, substrates were treated with hydrogen plasma  
25 (45 min., 600 W, 0.3 mbar, TePla PS 210, Wettengel, Germany) (see also Fig. S1a,b).

26

27 *Photolithography:* Substrates with Au nanoparticle arrays were spin-coated with a 1.1-  
28 1.3 μm thick layer of SU-8-2 negative resist (Micro Resist Technology GmbH, Berlin,  
29 Germany). Soft-baking was performed according to the manufacturer's instructions and  
30 the microstructure was transferred to the resist layer by illumination through a chromium  
31 mask with UV light of a HBO 350 mercury lamp at a dose of 50 mJ/cm<sup>2</sup>. After post-  
32 exposure baking the structure was developed in the recommended developer solution  
33 (MR-Dev600, Micro Resist Technology GmbH, Berlin, Germany). Unprotected particles  
34 were detached by sonication for two min. in an aqueous solution of 1% cysteamine.  
35 Eventually, the highly cross-linked resist was removed by hydrogen plasma treatment  
36 (150 min., 150 W; 0.4 mbar, TePla 100-E, Wettengel, Germany) (see also Fig. S1c).

37

38 *Structure analysis:* Structure dimensions were analyzed by scanning electron  
39 micrographs using ImageJ (<http://rsbweb.nih.gov/ij/>) and a custom-made plug-in (kindly  
40 provided by Philipp Girard) comparing the generated pattern to an ideal hexagonal  
41 pattern. Particle distances and densities of the quasi-hexagonally ordered patterns were  
42 calculated and respective errors were obtained by Gaussian error propagation. The SEM  
43 pictures were performed using a Zeiss LEO 1530 (ZeissSMT, Oberkochen, Germany)  
44 with acceleration voltages of approximately 5 keV and working distances between 5 and  
45 10 mm.

46

47 *Purification of IE<sup>k</sup>-MCC-Cys:* IE<sup>k</sup>-MCC-Cys-producing S2 cells were grown in Sf-900  
48 IITMSFM medium (Invitrogen) at 27°C, 90 rpm shaker incubator, and induced for three  
49 days at 20 million/ml with 0.5 mM copper (II) sulfate (CuSO<sub>4</sub>). The supernatant was  
50 collected by centrifuging the cells down at 3000 rpm for 10 min. and filtered through  
51 0.22 µm Millipore Stericup filters (Millipore). 1mM EDTA and 0.05% azide was added  
52 to the supernatant to prevent protein degradation. The purification of IE<sup>k</sup>-MCC-Cys was  
53 carried out following standard cobalt-column affinity purification at 4°C. His Pur<sup>TM</sup> resin  
54 (Thermo scientific) was washed with equilibration buffer (50 mM sodium phosphate, 300  
55 mM sodium chloride, 10 mM imidazole, pH 7.4) and the equilibrated resin was slowly  
56 stirred overnight with the filtered supernatant at 4°C. The resin was then transferred into  
57 an empty column cartridge (Thermo scientific) and washed with five resin-bed volumes  
58 of equilibration buffer for three times. The protein was eluted with elution buffer (50 mM

59 sodium phosphate, 300 mM sodium chloride, 150 mM imidazole, pH 7.4). The  
60 absorbance of the eluted fractions was measured at 280 nm and run in SDS-PAGE gel for  
61 protein detection. All cobalt fractions containing IE<sup>k</sup>-MCC-Cys (molecular weight 65  
62 kDa) were pooled together and further purified through a gel filtration column, HiLoad  
63 16/600 Superdex 200 prep grade (GE healthcare) in AKTA xpress.

64

65 *Bio-functionalization:* Substrates were rendered hydrophilic by a reactive hydrogen  
66 plasma (6 min., 150 W, 0.4 mbar, TePla 100-E, Wettenberg, Germany) before they were  
67 placed into a custom-made glass rack and transferred into a clean glass flask containing a  
68 1 mM solution of the linear poly-(ethylene glycol) mPEG2000-urea (CH<sub>3</sub>-O-(CH<sub>2</sub>-CH<sub>2</sub>-  
69 O)<sub>43</sub>-NH-CdO-NH-CH<sub>2</sub>-CH<sub>2</sub>-CH<sub>2</sub>-Si(OEt)<sub>3</sub>) in dry toluene (Merck) and 0,05%  
70 triethylamine (99,5%, Sigma Aldrich). Samples were kept at 80°C under nitrogen  
71 atmosphere for at least 12 hours (covalent coupling of PEG). Slides were then removed  
72 from the flask and sonicated 3 times for 5 min. in ethylacetate (p. A., Merck) and 3 times  
73 in methanol (p. A., Sigma Aldrich) and dried. The glass slides were immediately placed  
74 upon a droplet of NTA (1 mM) in pure ethanol (Sigma-Aldrich) and incubated for at least  
75 1 hour at 4°C, then rinsed with pure ethanol and dried with pure nitrogen. The glass  
76 bottoms of 8 well Lab-Tek Chambers (Sigma-Aldrich) were removed and replaced by the  
77 bio-functionalized surfaces. The chambers were incubated for 20 min. in a 100 mM  
78 aqueous solution of nickel-chloride, rinsed with phosphate buffered saline (PBS),  
79 followed by an incubation with His-tagged pMHC (5 µg/ml) over night at 4°C. Before  
80 seeding the cells, the samples were intensively rinsed with PBS. Additionally, several  
81 types of control surfaces were used. As positive controls, appropriate Lab-Tek chambered

82 glass slides were incubated with pMHC or entirely Au-coated glass slides were  
83 biofunctionalized with NTA-Ni and His-tagged pMHC as described above. Negative  
84 controls consisted of either glass slides without Au particles (PEG surfaces) processed the  
85 same way as the structured surfaces, or appropriate Lab-Tek chambered glass slides  
86 without any treatment.

87

88 *Quantification of pMHC molecules per particle:*

89 Samples were prepared, processed and evaluated as described in the fabrication, bio-  
90 functionalization and image analysis section. The background was bio-inert due to a  
91 covalently-bound PEG layer and particles served as anchor for the pMHC, IE<sup>k</sup>-2xHis<sub>6</sub>-  
92 MCC-Atto655 attached via NTA-Ni. The pMHC concentration was 5 µg/ml for bulk  
93 measurements and was reduced by a factor of 100 to determine the single molecule signal.  
94 All experiments were performed on a modified Axiovert 200M epi-fluorescence  
95 microscope (Zeiss, Germany) at 37 °C (Incubator XL S1, Heating Stage P Lab-Tek S1,  
96 Objective Heater S1, Zeiss). For excitation of the fluorophore, a diode laser (iBeam smart  
97 640, Toptica, Germany), which was directly modulated in time, was employed. The laser  
98 light was coupled into the microscope using a custom-built free-beam-path optical system.  
99 The field of sample excitation was limited using a rectangular aperture in the optical  
100 pathway. The sample was excited via a 100x, NA=1.46 Apochromat objective (Zeiss) for  
101 an illumination time of  $t_{\text{ill}}=1$  ms at 640 nm with an intensity of 5 kW/cm<sup>2</sup> (measured on  
102 the sample plane). The excitation wavelength was separated from the fluorescence using  
103 a dichroic mirror (z405/515/647/1064rpc, Chroma, USA). The fluorescence itself was

104 split in the detection pathway using the Optosplit-II-device (Cairn Research, UK) and a  
105 custom filter combination (HC Beamsplitter 662 imaging, Brightline HC 685/40,  
106 Semrock). Images were recorded on a back-illuminated, liquid-cooled EMCDD camera  
107 (iXon Ultra 897, Andor, UK) operated at 17 MHz readout speed with a varying EM gain.  
108 A self-written software (Labview, National Instruments, USA) generated the timing  
109 protocol for the diode lasers/ camera and recorded the images.

110 Images were analyzed using self-written algorithms in Matlab (Mathworks, USA). The  
111 position of individual diffraction-limited fluorescence signals, as well as its width  $\sigma$ ,  
112 intensity and level of background noise, was determined using a Bayesian estimation  
113 algorithm. Bayes Rule gives the probability  $p(D/H)$  of an experimentally-obtained  
114 intensity distribution  $D$  for a hypothesis  $H$  as  $p(D/H) = p(H/D) \cdot p(D)/p(H)$ ,  $H$  in this  
115 study, being a Gaussian intensity distribution with the 5 parameters x-Position, y-Position,  
116 width, intensity and noise level (standard deviation of the background signal). Given that  
117  $p(D)$  is independent of the hypothesis-parameters and equal to 1, the equation can be  
118 simplified to  $p(D/H) = p(H/D)/p(H)$ . The algorithm determines the maximum  
119 probability  $p(H/D)$  by variation of the hypothesis-parameters within the prescriptive,  
120 theoretical limits for individual and diffraction-limited fluorescence signals. Depending  
121 on the actual hypothesis-parameters, the expectancy value of the intensity for each pixel  
122 is estimated through the underlying Poisson statistics. The probability  $p(D/H)$  for a  
123 whole 5 x 5 pixel sub-image area was calculated as the product of the 25 individual pixel  
124 probabilities (for background noise level a 7 x 7 pixel area was used). After localization  
125 of the maximum intensity value in the sub-image, a recursive, and for each parameter  
126 independent (because of the convex function characteristics of the intensity), an iterative

127 line search method was used in order to determine the values of all parameters for the  
128 maximized probability value.

129 In order to determine the average number of pMHC molecules per Au-nanoparticle the  
130 fluorescence intensity of areas sized  $110 \mu\text{m}^2$  was determined and compared with the  
131 average intensity value of one single pMHC molecule. The resulting number of pMHC  
132 molecules per area could be related to the amount of nanoparticles within the measured  
133 area. After correction for the background signal obtained from a sample incubated with  
134 unlabeled protein, this value was divided by the calculated average single molecule  
135 intensity ( $N > 300$ ). Because every parameter, such as incubation time, concentration of  
136 protein, washing steps, influences the signal intensity, a strict protocol was followed (see  
137 above) and chambers used for cell experiments were used. Fig. S2 shows the  
138 occupational rate of pMHC molecule per Au particle for surfaces with particle spacings  
139 between 100-150 nm. This particular distance range was chosen as this was shown to be  
140 the critical regime regarding T cell stimulation and allowed for the determination of the  
141 corresponding critical density. It should be noted that the fluorescent signal from a  
142 sample incubated with unlabeled protein did not differ from a sample without any protein.  
143 A negative control without Au-nanoparticles or without the linker molecule yielded  
144 similar negligible results. After correction for the labeling rate of the protein itself (here  
145 60%), the resulting protein density value was compared with the Au-nanoparticle  
146 intensity to calculate the mean protein/particle ratio, which was found to be  $1.6 \pm 0.4$   
147 molecules per particle. In order to show specificity of binding within the same surface,  
148 particle islands separated by empty areas were imaged (see main text).

149

150 *Preparation of cells:*

151 AND TCR transgenic mice were purchased from Jackson Laboratories (Bar Harbor,  
152 ME) and were crossed to B10.Cg-Tg (TcrAND) 53Hed/J (B10.AND). AND mice are  
153 alpha/beta TCR transgenic mice produced using the alpha and beta chain genes that  
154 encode a receptor specific for pigeon cytochrome c in association with IE<sup>k</sup> class II MHC  
155 molecules. The TCR expressed in these mice is composed of alpha and beta chains  
156 derived from the cytochrome-c specific T-cell clones AN6.2 and 5C.c7, respectively.  
157 This TCR is termed “AND” (for references see main text). All mice were housed in  
158 specific pathogen-free conditions and cared for in accordance with the protocol approved  
159 by Institutional and Animal Care and Use Committee. Experiments were performed on  
160 F1 progenies between 8 and 12 weeks of age. AND TCR Tg splenocytes cells were  
161 activated in DMEM (Invitrogen) with 10% fetal bovine serum (FBS) (Hyclone) using 1  
162 μM MCC peptide (MCC88-103). At 48 hours, cells were washed twice in complete  
163 medium and were plated at  $1 \times 10^6$  cells/ml with 50 U/ml of IL-2. The cells were  
164 replenished with fresh media and IL-2 every two days. After six days cells were deep-  
165 frozen and shipped to the laboratory where experiments were performed.

166 Cells were stored in liquid nitrogen and thawed approximately 24 hours prior to being  
167 seeded on nanopatterned surfaces. The cells were cultured in the appropriate liquid  
168 medium (RPMI 1640 with phenol red and glutamine, Invitrogen) supplemented with 10%  
169 FBS (Invitrogen) and 1% penicillin-streptomycin in cell culture flasks.

170

171 *Activation experiments:*



172 Cell suspensions were taken out of the cell culture flask, centrifuged, re-suspended in  
173 complete medium (details above) to achieve a cell density of 500 cells/ $\mu\text{l}$ . The cell  
174 density, which included a fraction of dead cells, was determined using trypan blue and a  
175 Neubauer Hemocytometer. 300  $\mu\text{l}$  of cell-suspension ( $1.5 \times 10^5$  cells) were added to each  
176 chamber presenting a bio-functionalized glass surfaces as bottom.

177 Alpha tubulin staining: 45 min. after the cells had been seeded on the surface and kept  
178 at 37 °C and 5%  $\text{CO}_2$ , they were fixed with 4% paraformaldehyde (PFA) at 37 °C for 10  
179 min. before being permeabilized with ice-cold methanol for 1 min. and washed three  
180 times with PBS and 2% bovine serum albumin (BSA). The surfaces were then incubated  
181 with monoclonal anti-beta tubulin Cy-3 labeled antibody (Sigma-Aldrich) at a  
182 concentration of 10  $\mu\text{g}/\text{ml}$  in PBS containing 2% BSA. The chambers were rinsed with  
183 PBS containing 2% BSA. Stained cells were imaged with an inverted fluorescence  
184 microscope (Olympus IX71, HBO lamp, Sony CCD Camera, Deltavision system) using  
185 appropriate filters and a 60-fold objective (Olympus).

186 Adhesion experiments:  $45 \pm 15$  min. after the cells had been in contact with the surface  
187 at 37 °C and 5%  $\text{CO}_2$ , cells were imaged with a custom-made reflection interference  
188 contrast microscope (RICM). Images were taken randomly and the fraction of adherent  
189 cells was calculated by manually counting adherent cells and non-adherent cells ( $n > 100$   
190 adherent cells for each data point). The fraction of dead cells (usually 30-40%), which  
191 was determined before seeding, was subtracted from the number of non-adherent cells.  
192 The contact area was determined using ImageJ by manually outlining the edge of cells ( $n$   
193  $> 100$  for each data point, except for cells plated on particle distances above 150 nm;  
194 where  $n > 15$  because of very low adhesion).

195 ELISA (IL-2 secretion): 200  $\mu$ l of supernatant were taken out of the chambers after 24  
196 hours of cell culture at 37 °C and 5% CO<sub>2</sub> and were used to determine the IL-2  
197 concentration within the medium with a high sensitivity ELISA analysis Kit from  
198 eBioscience (Mouse IL-2 ELISA Ready-SET-Go!<sup>®</sup>).

199

200

201 *Error Discussion:*

202 Determination of contact area:

203 The choice of 45 min. as measure point for T cell activation was based on practical  
204 experience. In theory T cells start to establish contact with the APC surface immediately  
205 after detection of antigen by the TCR. This cell contact can be formed within a short time  
206 period, and indeed it was observed in this study that some cells could reach their maximal  
207 size 2-10 min. after encountering the antigen. However, cells migrating on the surface  
208 before starting to spread could also be observed. Moreover, after being seeded, cells have  
209 to sink down to the bottom of the culture surface to be in contact with the surface. Once  
210 attached the majority of cells was found to remain adherent for up to two hours and then  
211 to migrate or show a smaller spreading extension. These time frames correlate well with  
212 the dynamics of IS formation, which is reported to start initially after antigen detection  
213 and to last up to two hours. Given these experimental observations and theoretical  
214 background, we found it reasonable to start measurements not before 30 min. after  
215 seeding and continued to acquire images for 30 min. It is possible that some cells might  
216 have shown a larger spreading area before images were taken, while others may had not

217 yet reached their maximal size at the time point of image acquisition. Furthermore, it is  
218 possible that some cells were still migrating and not adhesive and even migrating again  
219 after having already spread. However, for this study, it is not crucial, nor possible, to  
220 measure exactly the peak sizes of the spreading area. For mean values at a certain time  
221 point the different stages of spreading of individual cells averaged out. Moreover, we  
222 found the spreading area by itself not to be sufficiently indicative of T cell stimulation  
223 since the spreading area did not decrease significantly when nanoparticles were widely  
224 spaced, unlike other parameters tested that showed a clear correlation.

225 Quantification of the percentage of adherent cells: The number of spread cells was  
226 determined manually by counting the number of adherent and non-adherent cells in  
227 images randomly acquired. A software-based automated detection routine failed to  
228 determine the number of spread cells because of the difficulty to distinguish between  
229 non-adherent and adherent cells. While adherent cells (correspondent to black patches)  
230 can be detected it is very challenging to detect non-adherent cells.

231 Nevertheless, the manually collected data of number of adherent cells was included  
232 since the cellular contact area criteria alone was not enough to distinguish between  
233 stimulating/ non-stimulating substrates. The reason is due to the fact that those cells that  
234 spread, of course, reach a certain minimal spreading area. However, the few adherent  
235 cells on low pMHC-densities may only have been in contact with a defective pattern, dirt  
236 or unusual protein accumulations. In any case, it was obvious that the spreading behavior  
237 of cells crucially depended on the particle distance: it was observed that many cells  
238 spread on substrates with low distance-spacing while only a significantly reduced number  
239 (close to zero) of adherent cells could be observed on substrates with higher distance-

240 spacing. The fact that the fraction of adhesive cells reached its maximum at 60%  
241 adhesion may reflect that only 60% of viable cells are competent to adhere. This is  
242 common in primary cell cultures as some of the viable cells are in the process of dying.  
243 Additionally, at a certain time point there is always a fraction of cells, which has already  
244 been adherent or will adhere at a future time point. On the low end there is typically a  
245 threshold below which no adhesion is observed, however there is still a small fraction of  
246 cells behaving aberrantly. These cells might have just adhered non-specifically or have  
247 found pattern defects as described above. However, the chosen method to quantify this  
248 experimental observation is a suitable way to translate this observation into numbers.  
249 This information in combination with the IL-2 data becomes very significant as the IL-2  
250 secretion results correlate well with the cellular spreading data.

251 Quantification of IL-2 secretion: The reason why we chose to use the index of  
252 activation, thus a normalized value instead of absolute IL-2 values is because of the  
253 significant variability in each experiment, depending on factors such as cell densities that  
254 can be slightly different, proteins that may be less functional and most importantly,  
255 because living cells can behave differently depending on the cell batch used. Hence, the  
256 absolute values of IL-2 secretion can differ significantly (up to a factor 2 in this study)  
257 even under the same conditions. This difference is not due to the different surfaces used  
258 but to the circumstances described above. In order to eliminate this variability effect in a  
259 statistical assessment every type of surface would have to be included in each individual  
260 experiment. This, however, was not possible due to the large number of different surface  
261 parameters tested. Therefore, an alternative to eliminate the effect of differently behaving  
262 cell batches (or other unspecified effects) is to perform normalization. Therefore each

263 absolute IL-2 concentration value was compared to a control value, which in this study  
264 consisted of the amount of IL-2 that cells secreted when cultured on entirely coated  
265 pMHC surfaces (positive control surfaces). Thus, each experiment performed in included  
266 at least two positive control surfaces whose average IL-2 value was set as standard value  
267 1.

268 Error determination for spacing and densities:

269 The distances  $d$  between Au nanoparticles and their deviations were determined using a  
270 custom-made plug-in for ImageJ, which calculated the average distance by comparing  
271 each pattern with an ideal hexagonal pattern. Here we provide the deviation for the single  
272 value but not for the mean value, as the latter can be made arbitrarily small since it  
273 depends on  $N$  (the higher the  $N$ , the smaller the error), which in this case corresponds to  
274 the number of particles taken into account. This number can be chosen to be very high  
275 therefore making the standard error of the mean very small. However, we found it  
276 reasonable to provide deviations of single values (for micrometer sized areas) as the cell  
277 senses single particle spacing or at least only averages within a restricted micrometer-  
278 sized area. The particle densities were calculated using the following equation:

$$q = \frac{2}{\sqrt{3}} \times \frac{1}{d^2}, [q] = \text{number of particles}/\mu\text{m}^2$$

279 with the deviation  $s_q = \frac{4 \sigma_d}{\sqrt{3}} \times \frac{1}{d^3}, [s_q] = \text{number of particles}/\mu\text{m}^2$

280 when  $\sigma_d$  is the deviation of the distance  $d$ .

281 It may seem strange that the absolute error bars for high densities are much higher than  
282 for low densities. This difference is not due to a specific pattern limitation but to the  
283 following: (i) the absolute values of densities, which for small distances are significantly  
284 higher (the relative deviations are not as high) and also to (ii) the Gaussian error  
285 propagation, which increases the relative error of densities in comparison to the relative  
286 errors of spacings. Since  $d$  is part of the equation for  $s_p$  with the power to three in the  
287 denominator the relative errors increase, in comparison to the relative errors of the  
288 distance. For example, for small distances approximately  $(34 \pm 5)$  nm leads to a density  
289 of  $(1000 \pm 300)$  particles/  $\mu\text{m}^2$  (30% relative deviation), while a distance of  $(276 \pm 27)$   
290 nm leads to a density of  $(15 \pm 3)$  particles/  $\mu\text{m}^2$  (20 % relative deviation). When displayed  
291 in a graph as the one included in this manuscript, it can be seen that pattern deviation for  
292 high densities is much larger which is only true for the absolute value but not for relative  
293 deviations.

294 Determination of pMHC molecules per particle: The bulk fluorescence intensity  
295 measurements that were applied to determine to bound molecules per particle was, to the  
296 best of our knowledge, the most suitable to obtain statistical relevant values. 800 values  
297 out of 8 samples (2 chambers each) were determine in order to gather good statistics as it  
298 was observed that the number of bound molecules depends on several parameters:  
299 obvious ones like size of particles but also non-expected ones like incubation time,  
300 washing steps and time. Therefore, we followed a strict functionalization protocol for cell  
301 experiments and applied exactly the same procedural steps for the microscopy analysis.

302

303

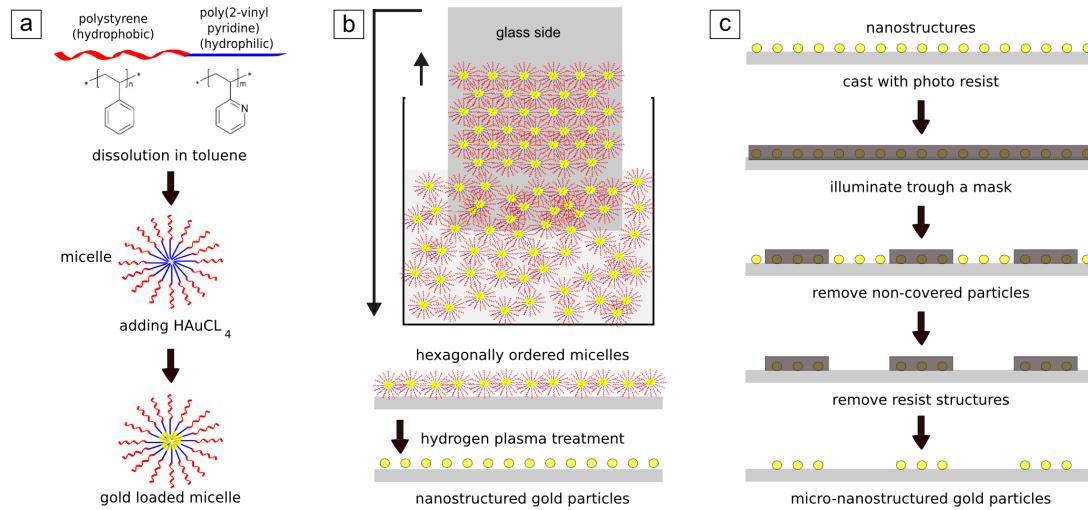

304

305 Figure S1: Schematic representation of the substrate fabrication steps: a) Au-loaded  
306 micelle formation process within a non-polar solvent; b) Formation of quasi-hexagonal  
307 nanopatterned Au particles on solid substrates; c) Fabrication of micro-nanostructured Au  
308 particles on solid substrates.

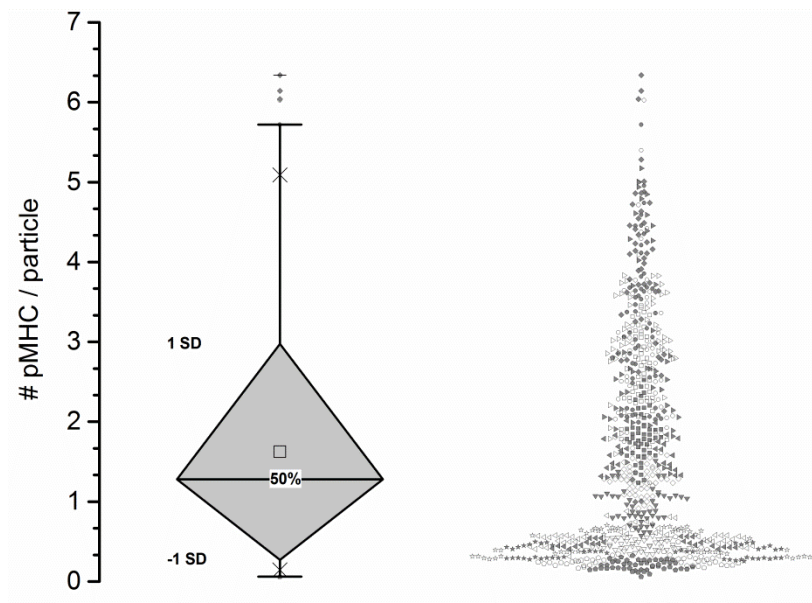

309

310 Figure S2: Occupation rate of pMHC molecules per Au particle for surfaces with  
311 distances between 100-150 nm (for each evaluated surface the distance was determined

312 individually). Symbols represent data points for the different surfaces. Same symbols  
313 filled and non-filled represent data points from the same surface but correspond to  
314 different chambers.
